# Supplementary material for: A data-driven approach to preprocessing Illumina 450K methylation array data
Source: Springer Nature journal article supplement (doi:10.1186/1471-2164-14-293), 2013-05-01

# Cohort\_1B

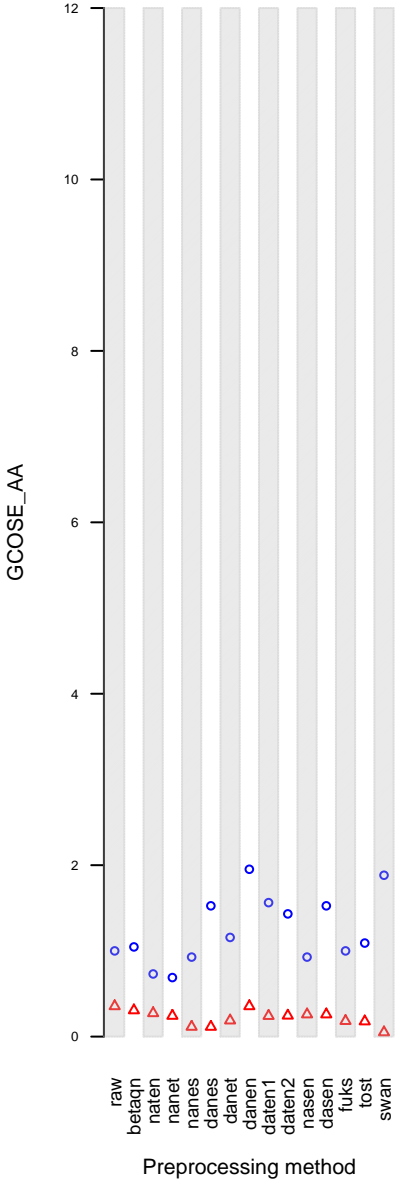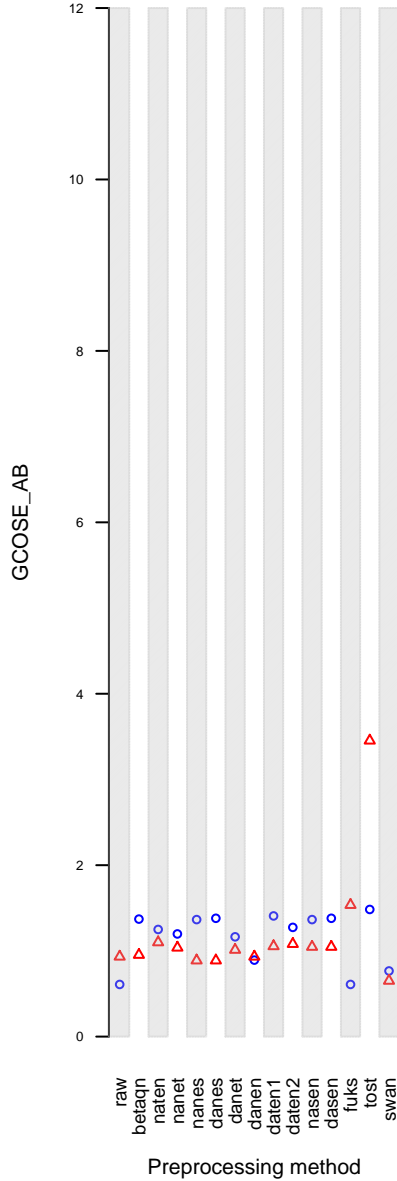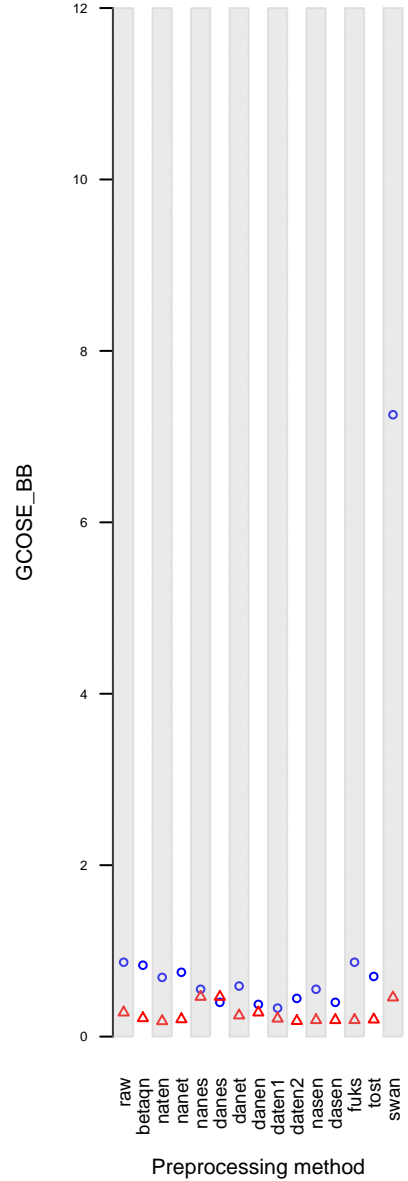

# Cohort\_1C

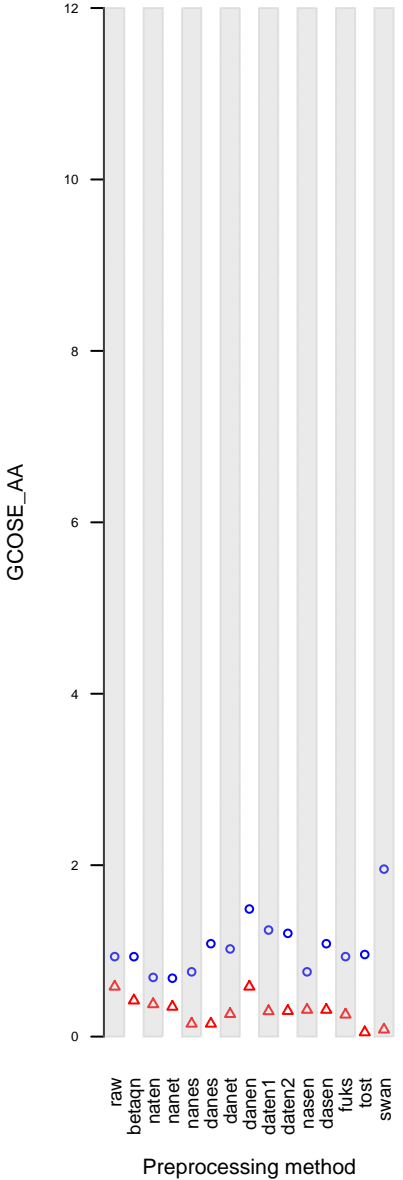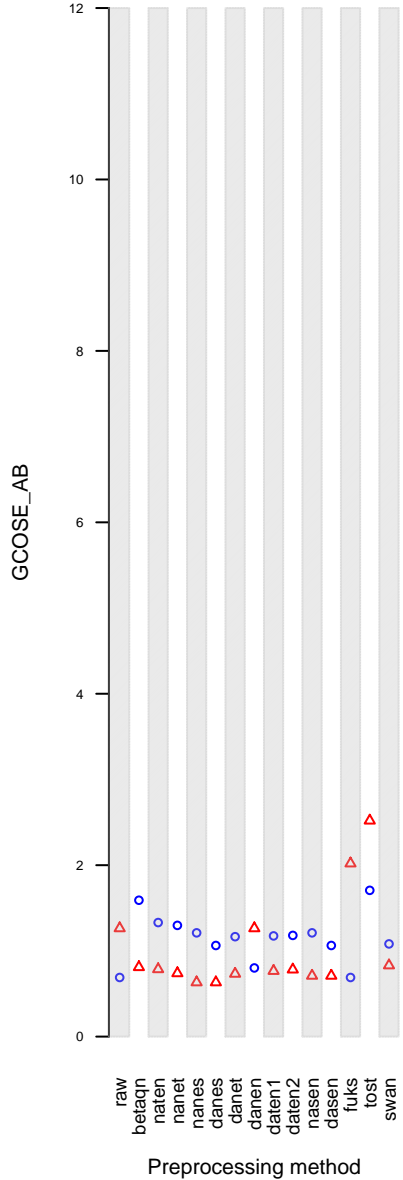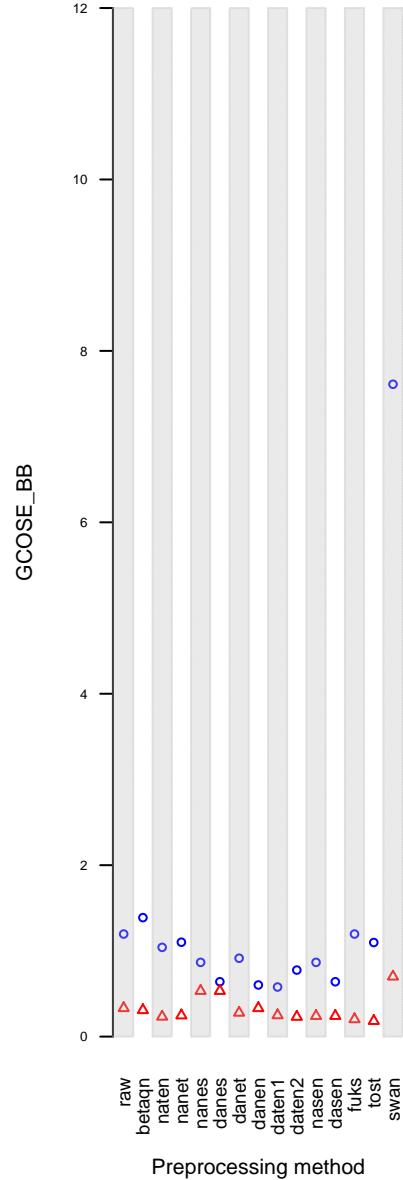

# Cohort\_1D

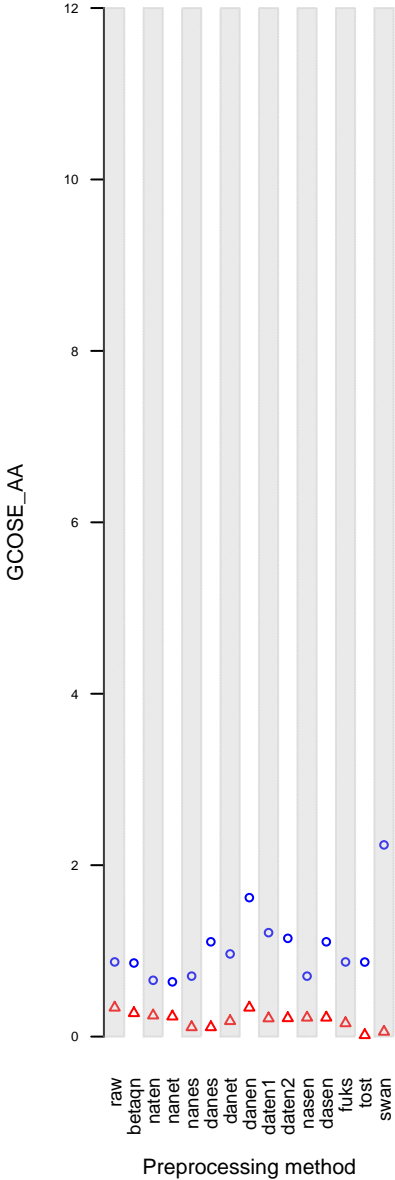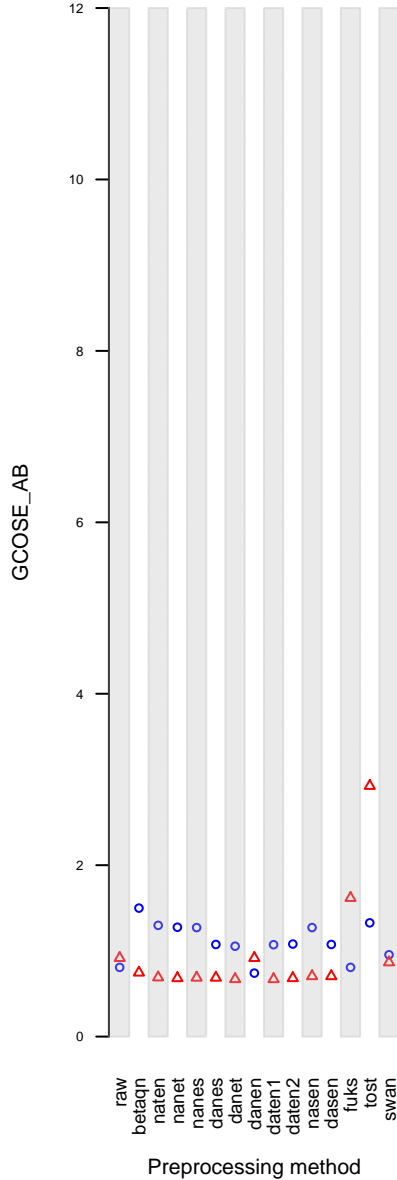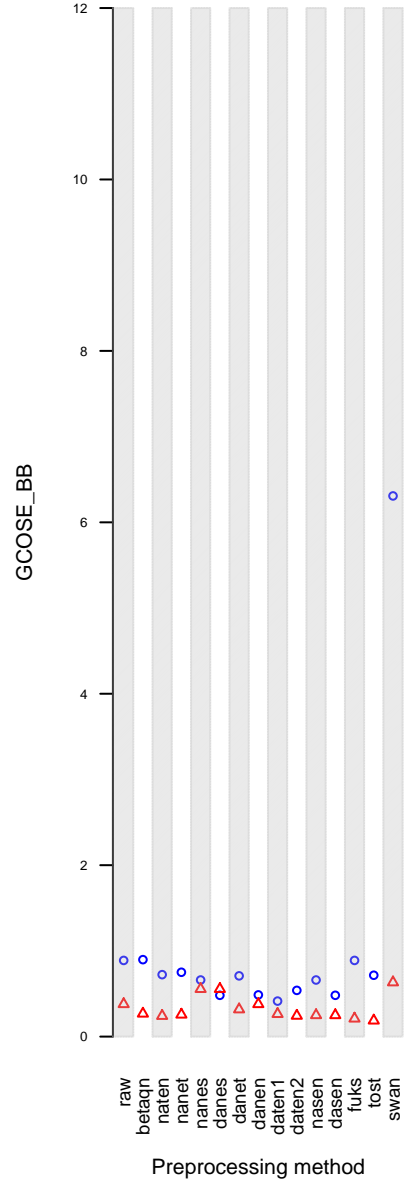

# Cohort\_1Ai

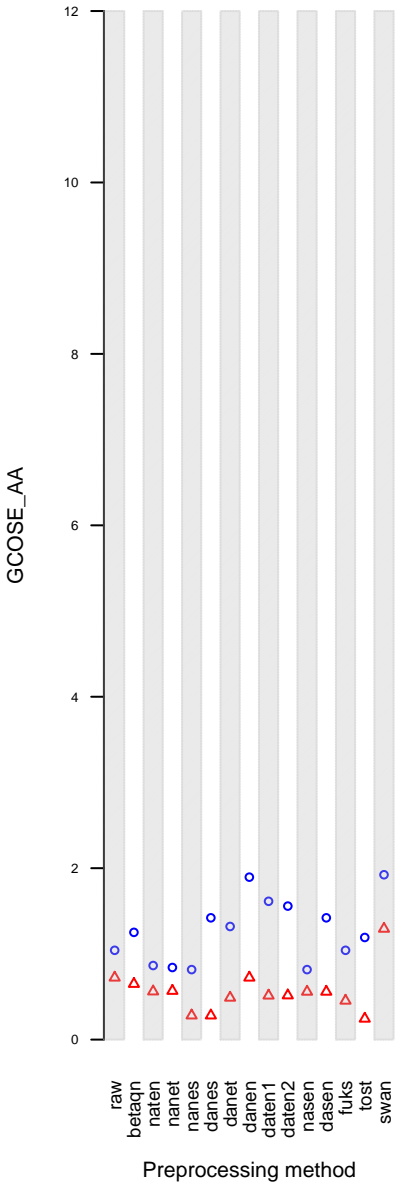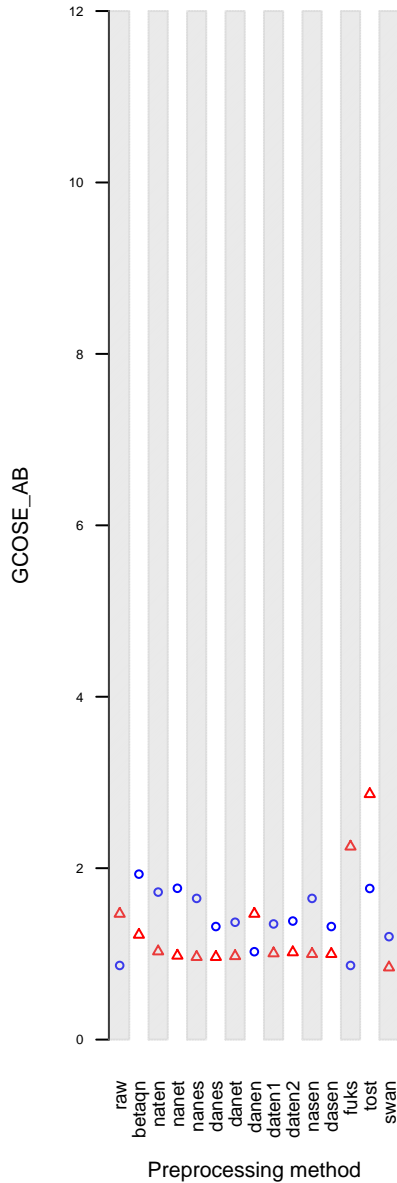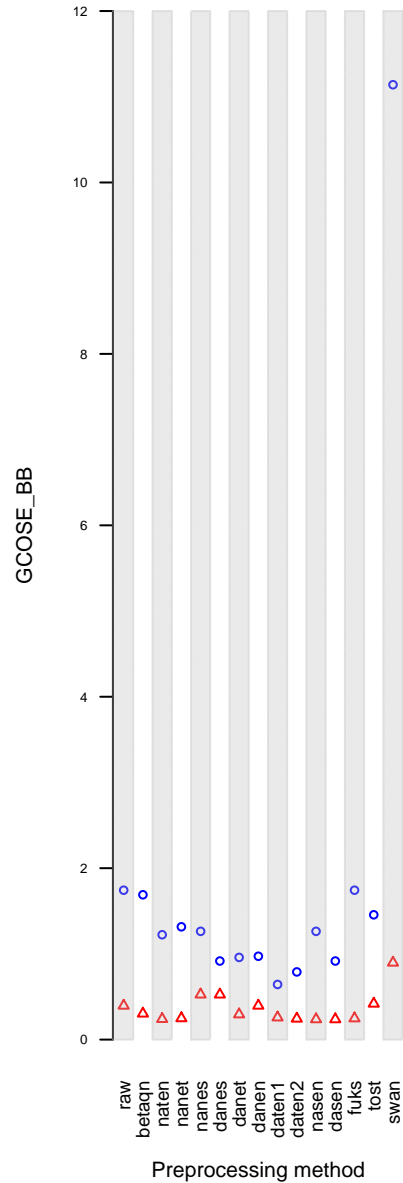

# Cohort\_1BC

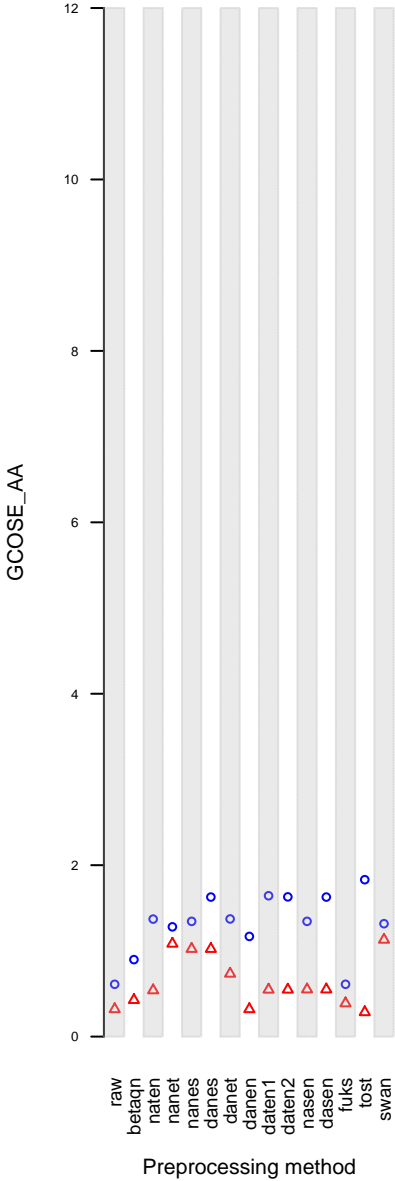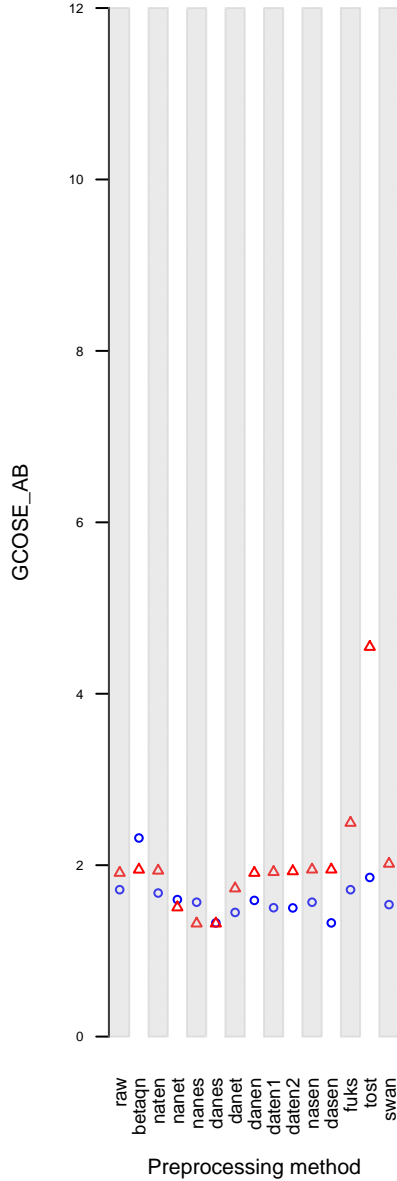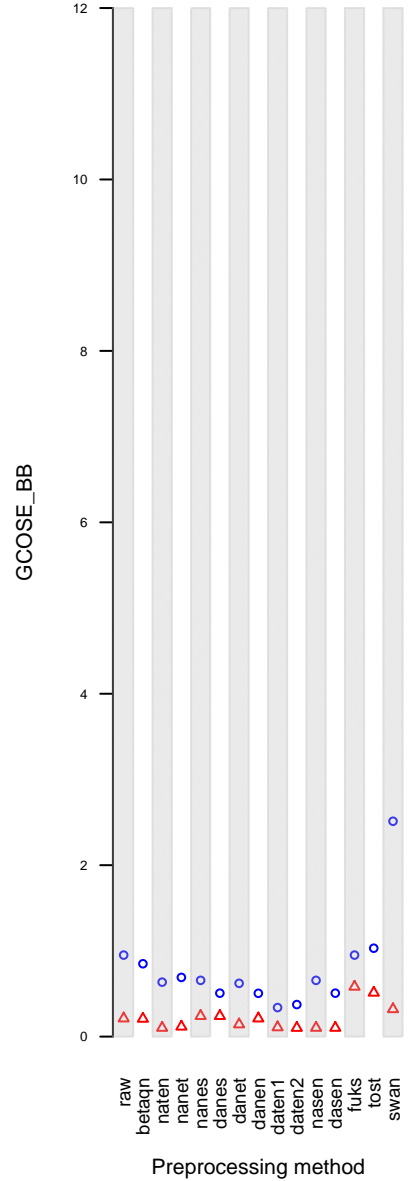

# Cohort\_1AD

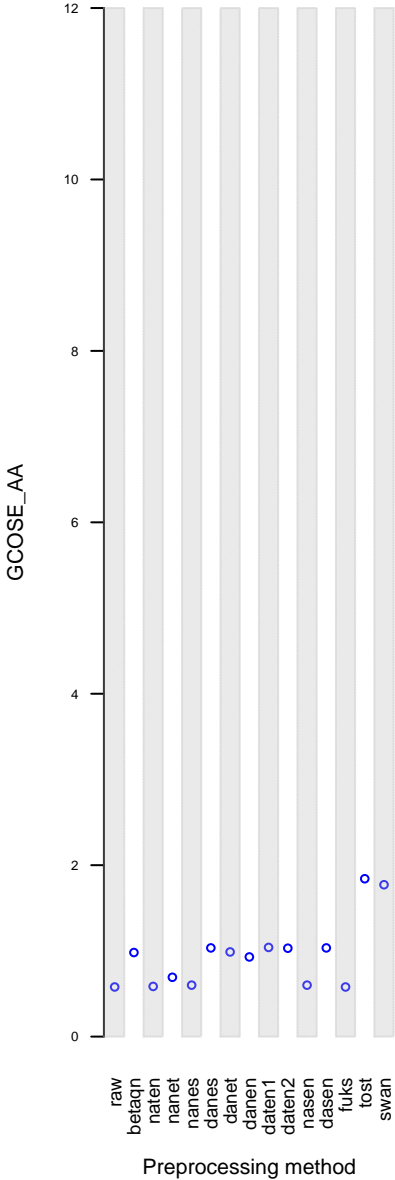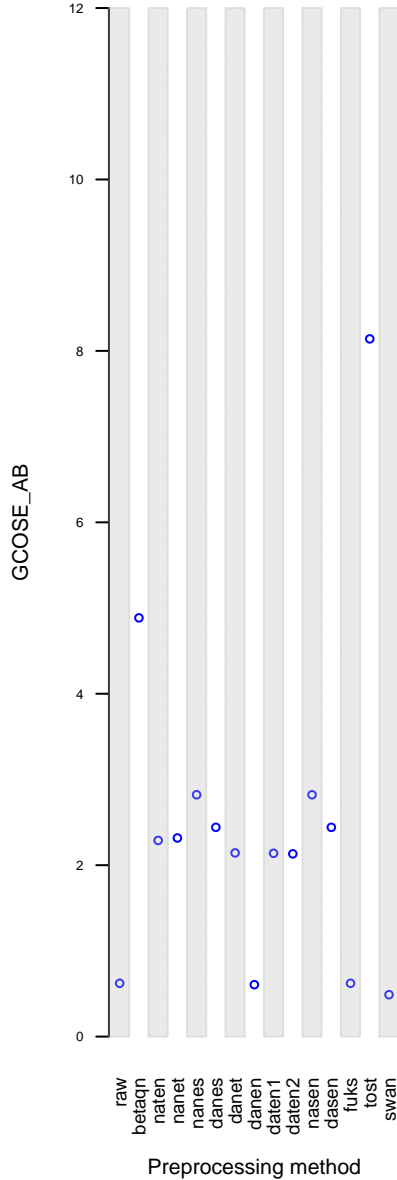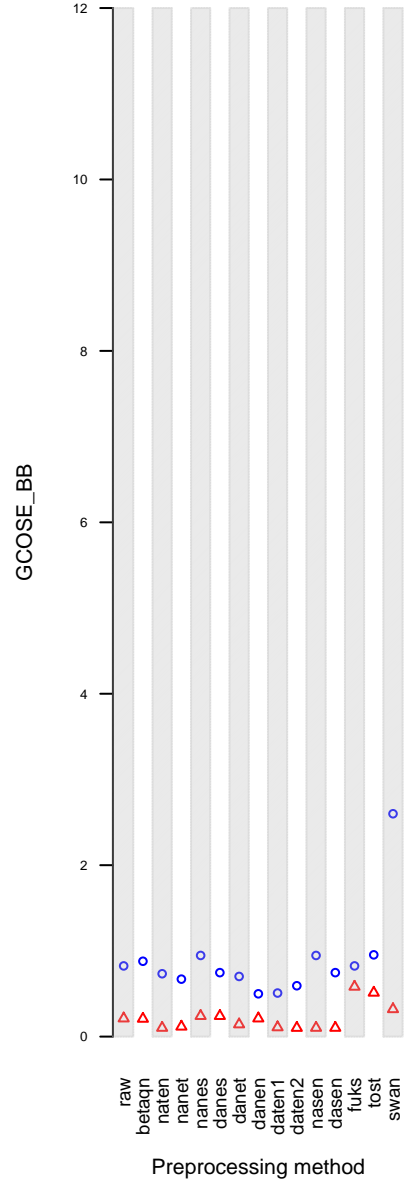

# Cohort\_1Ai

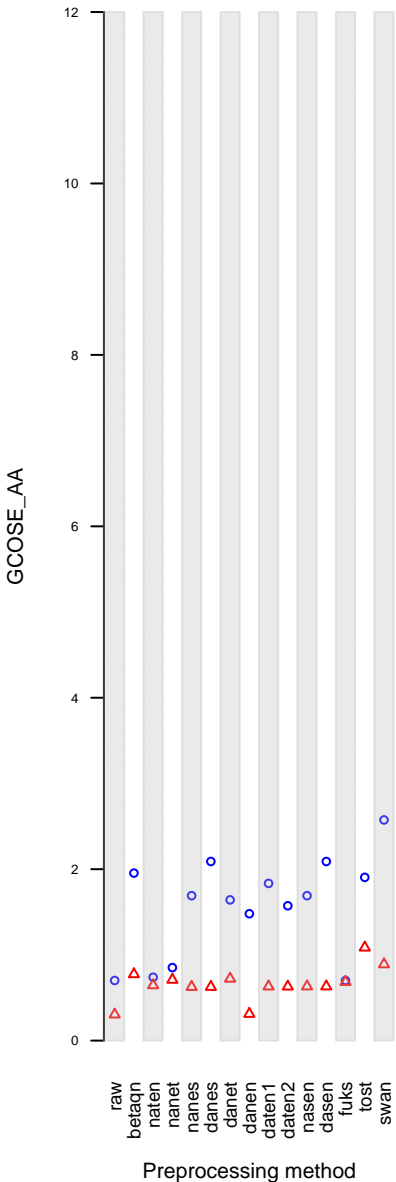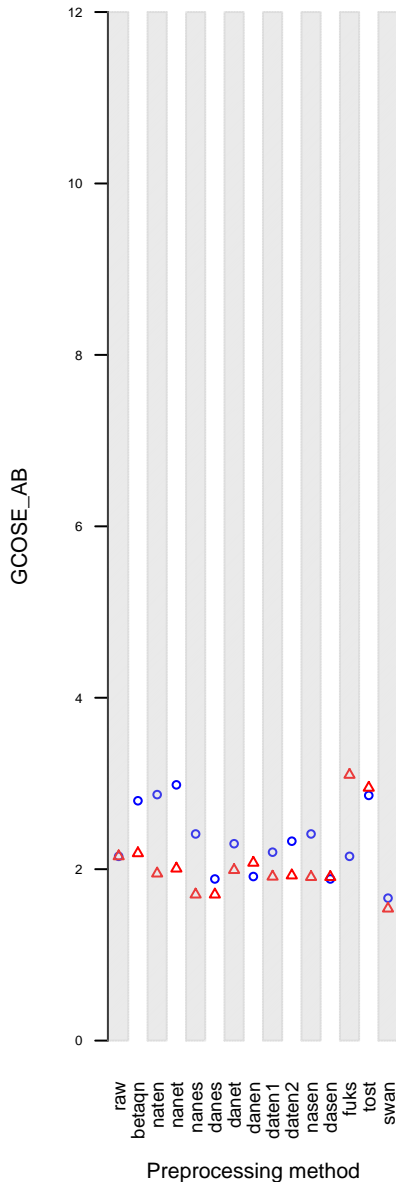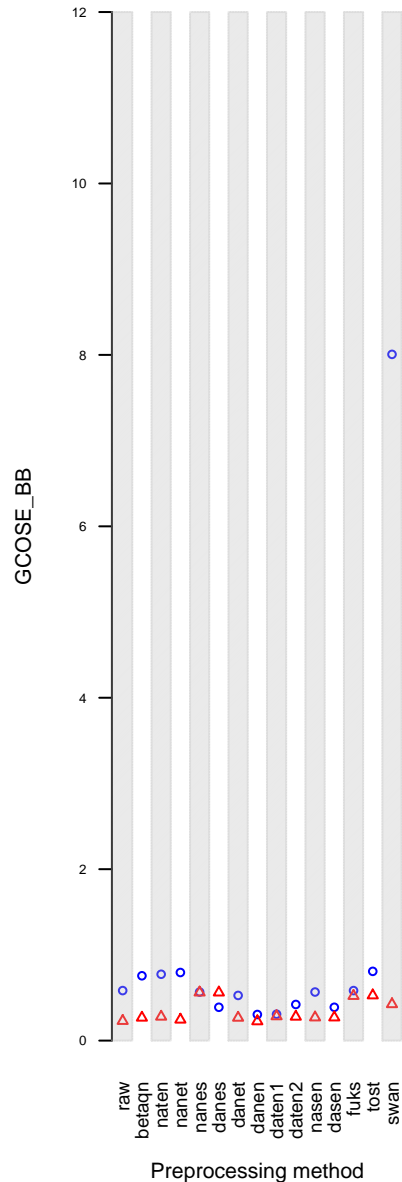

# Cohort\_1F

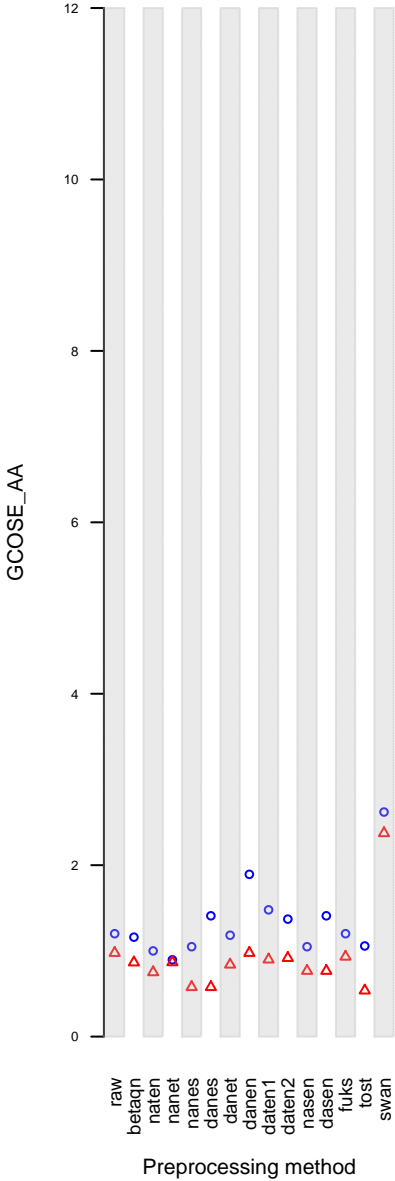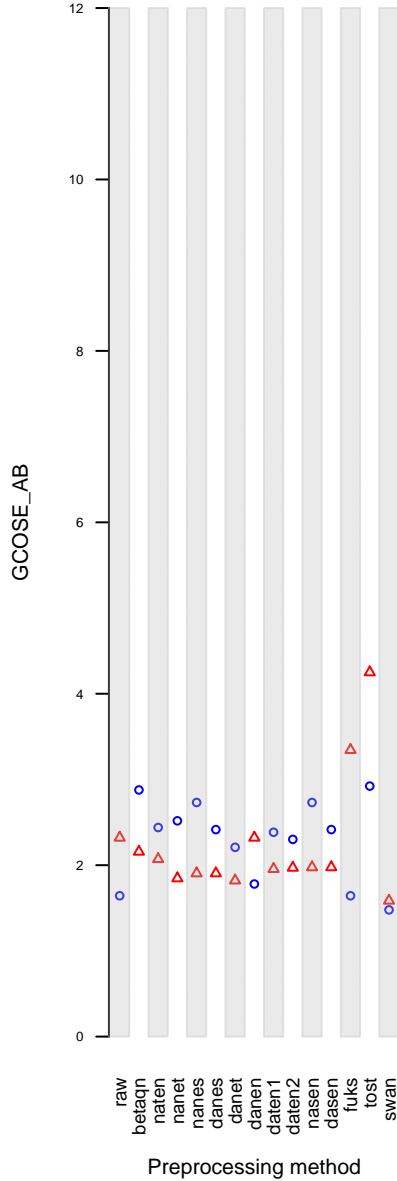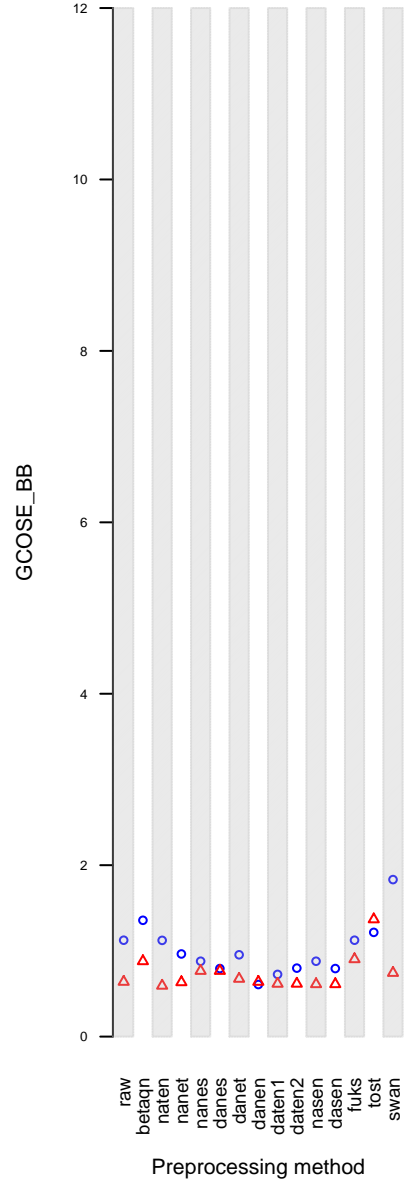



# Cohort\_2A

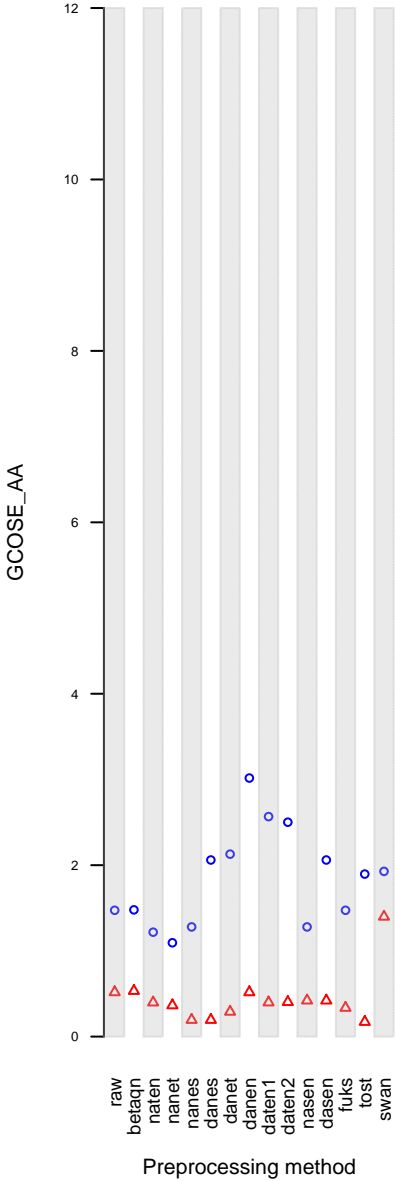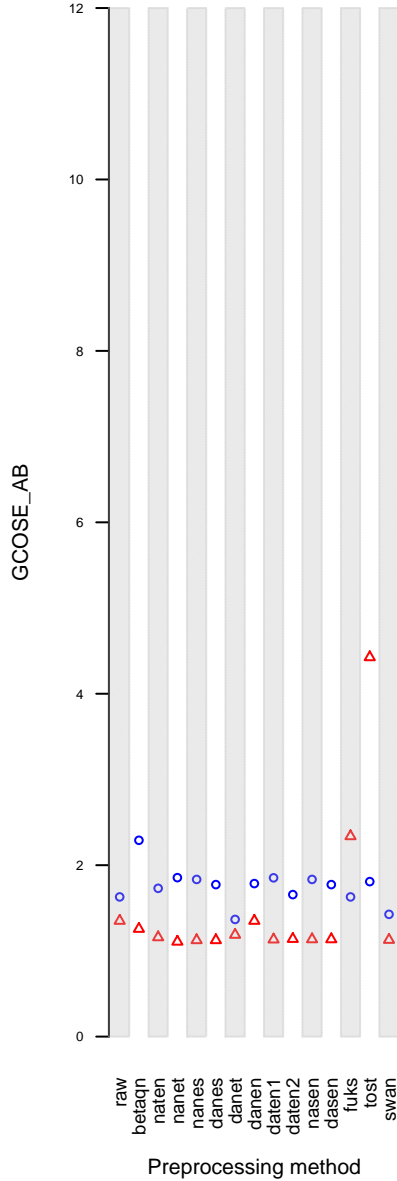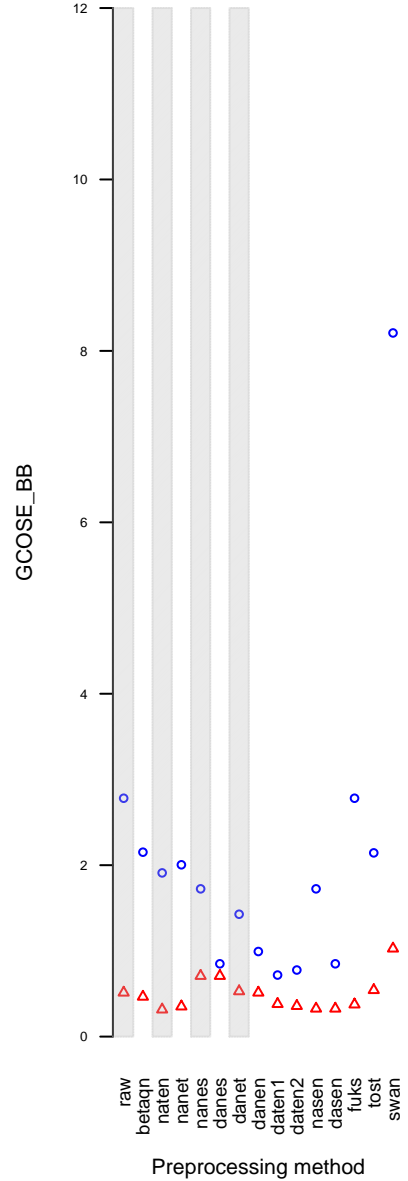

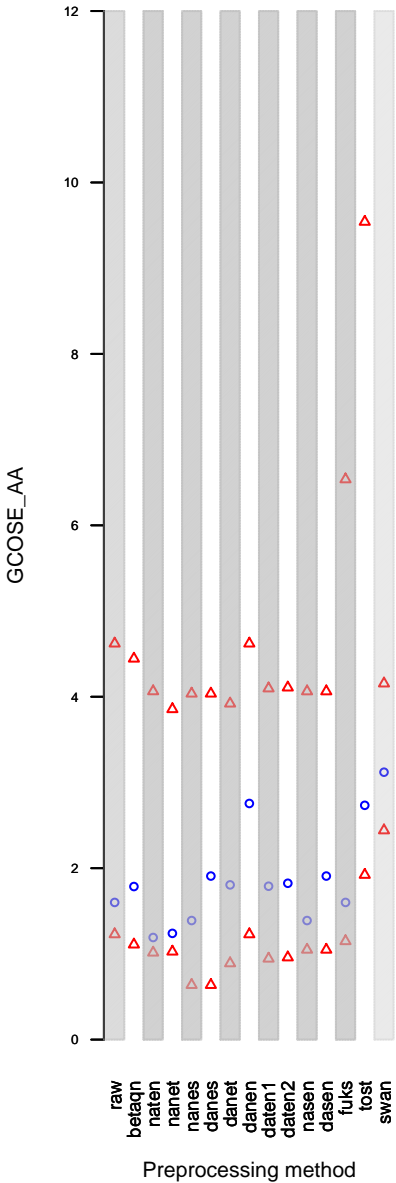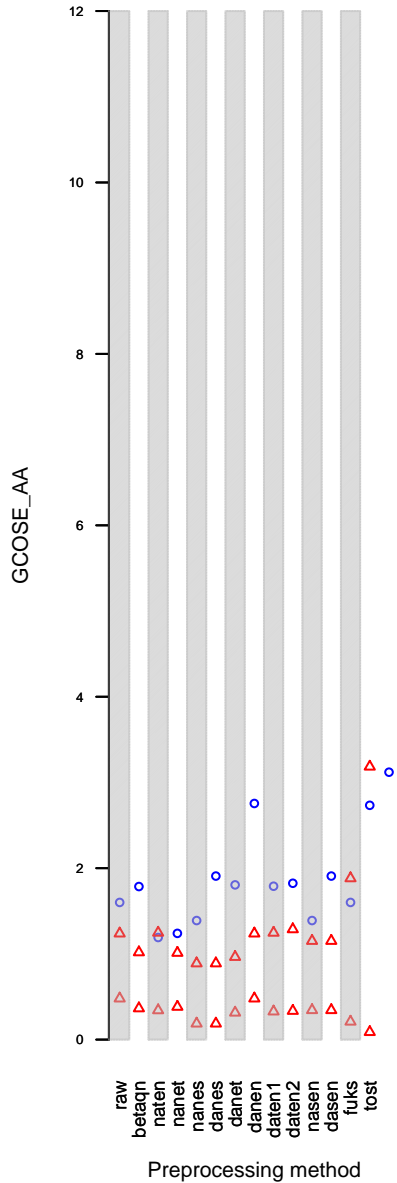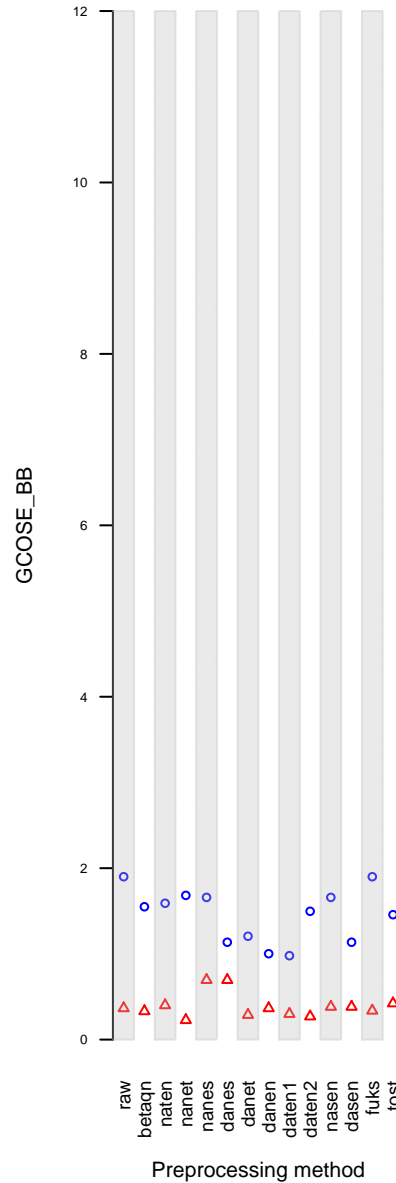

Supplement: 12864_2013_5051_MOESM6_ESM.pdf [file 12864_2013_5051_MOESM6_ESM.pdf]
