# Supplementary material for: A data-driven approach to preprocessing Illumina 450K methylation array data
Source: Springer Nature journal article supplement (doi:10.1186/1471-2164-14-293), 2013-05-01
Supplement: 12864_2013_5051_MOESM1_ESM.pdf [file 12864_2013_5051_MOESM1_ESM.pdf]

| Cohort      | Sample Type                         | Total N | Total number of arrays | Gender |        |    |
|-------------|-------------------------------------|---------|------------------------|--------|--------|----|
|             |                                     |         |                        | Female | Male   | NA |
| Cohort 1Ai  | Cerebellum                          | 91      | 8                      | 55     | 36     |    |
| Cohort 1Aii | Cerebellum                          | 36      | 3                      | 21     | 13     | 2  |
| Cohort 1B   | Frontal cortex                      | 89      | 8                      | 56     | 33     |    |
| Cohort 1C   | Entorhinal cortex                   | 93      | 8                      | 59     | 34     |    |
| Cohort 1D   | Superior temporal gyrus             | 94      | 8                      | 57     | 37     |    |
| Cohort 1E   | Whole blood                         | 95      | 8                      | 53     | 28     | 14 |
| Cohort 1AD  | Cerebellum, Superior temporal gyrus | 47      | 4                      | 11, 13 | 12, 11 |    |
| Cohort 1BC  | Frontal cortex, Entorhinal cortex   | 46      | 4                      | 11,7   | 16,12  |    |
| Cohort 2A   | Cerebellum                          | 42      | 4                      | 14     | 28     |    |
| Cohort 2B   | Frontal cortex                      | 43      | 4                      | 15     | 28     |    |
| Cohort 3A   | Cerebellum                          | 18      | 2                      | 0      | 18     |    |
