# Supplementary material for: A data-driven approach to preprocessing Illumina 450K methylation array data
Source: Springer Nature journal article supplement (doi:10.1186/1471-2164-14-293), 2013-05-01

dmrse (x10<sup>-3</sup>)

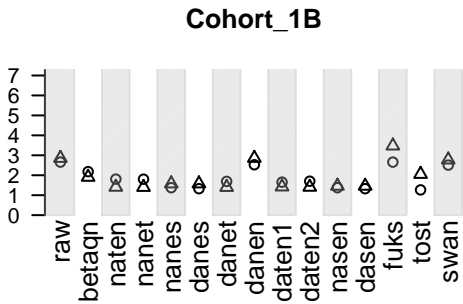

dmrse (x10<sup>-3</sup>)

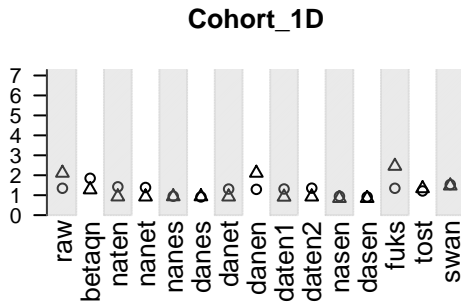

dmrse (x10<sup>-3</sup>)

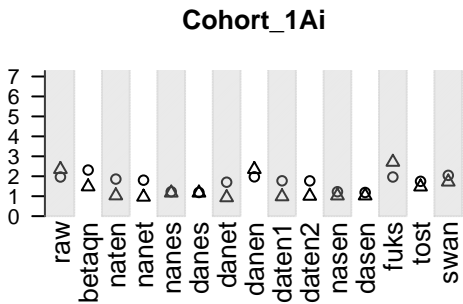

dmrse (x10<sup>-3</sup>)

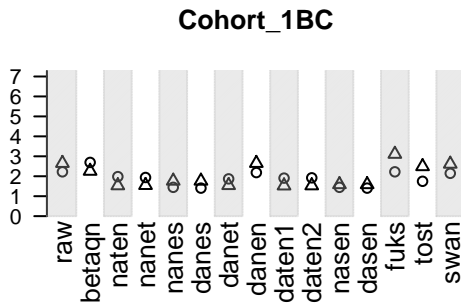

dmrse (x10<sup>-3</sup>)

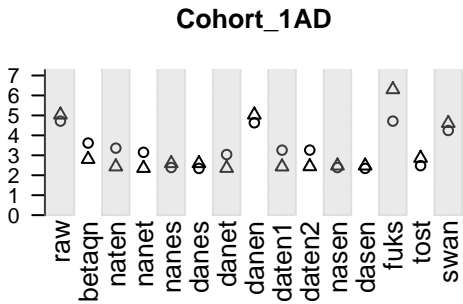

dmrse (x10<sup>-3</sup>)

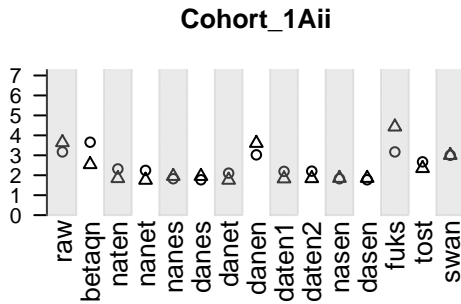

dmrse (x10<sup>-3</sup>)

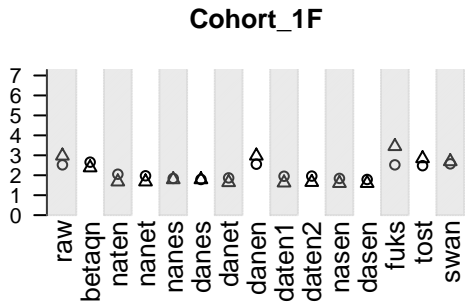

dmrse (x10<sup>-3</sup>)

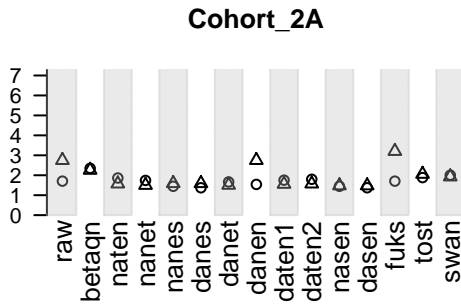

dmrse (x10<sup>-3</sup>)

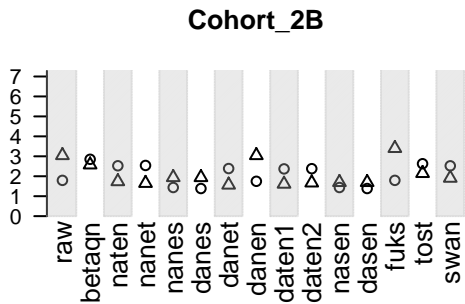

dmrse (x10<sup>-3</sup>)

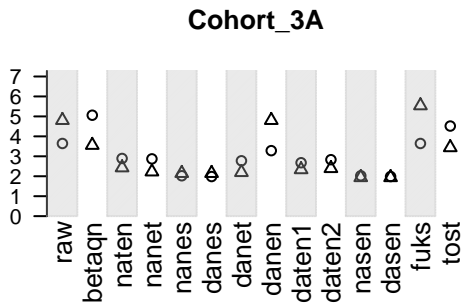

Supplement: 12864_2013_5051_MOESM3_ESM.pdf [file 12864_2013_5051_MOESM3_ESM.pdf]
