# Supplementary material for: A data-driven approach to preprocessing Illumina 450K methylation array data
Source: Springer Nature journal article supplement (doi:10.1186/1471-2164-14-293), 2013-05-01

seabird (x10<sup>-2</sup>)

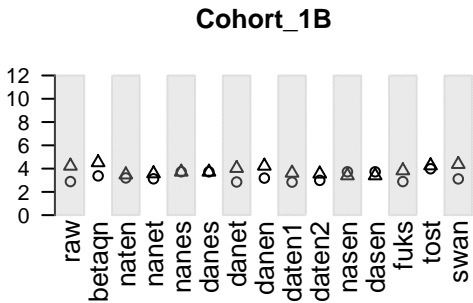

seabird (x10<sup>-2</sup>)

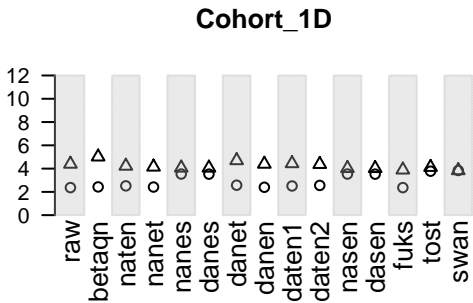

seabird (x10<sup>-2</sup>)

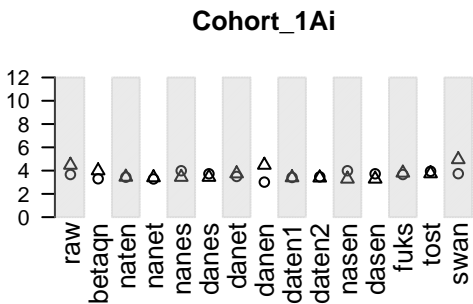

seabird (x10<sup>-2</sup>)

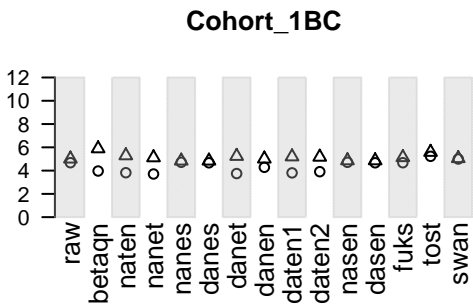

seabird (x10<sup>-2</sup>)

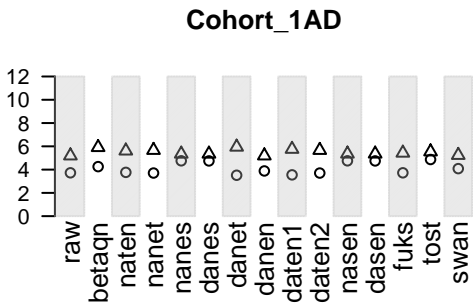

seabird (x10<sup>-2</sup>)

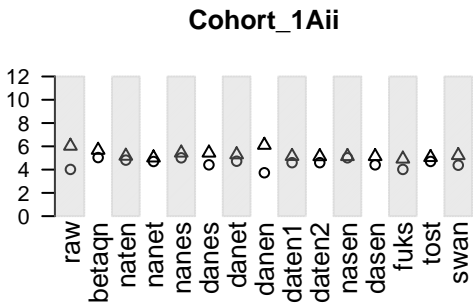

seabird (x10<sup>-2</sup>)

Cohort\_1F

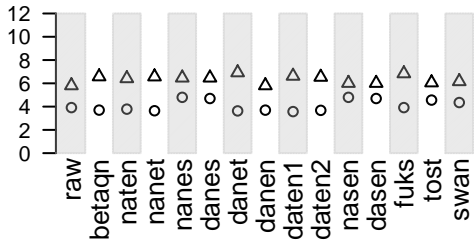

seabird (x10<sup>-2</sup>)

Cohort\_2A

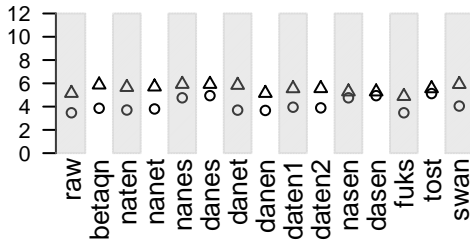

seabird (x10<sup>-2</sup>)

Cohort\_2B

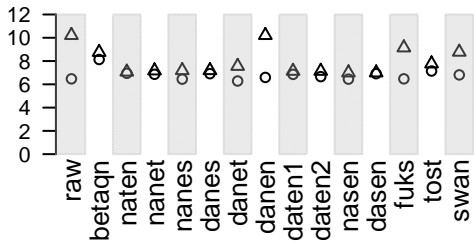

Supplement: 12864_2013_5051_MOESM5_ESM.pdf [file 12864_2013_5051_MOESM5_ESM.pdf]
