# Supplementary material for: A data-driven approach to preprocessing Illumina 450K methylation array data
Source: Springer Nature journal article supplement (doi:10.1186/1471-2164-14-293), 2013-05-01
Supplement: 12864_2013_5051_MOESM7_ESM.pdf [file 12864_2013_5051_MOESM7_ESM.pdf]

# Example of ranking method: Cohort 1BC, Type I probes

A. Calculate the metric scores (DMRSE, GCOSE\_AA, GCOSE\_AB, GCOSE\_BB, Seabird) for each of the 15 preprocessing methods (raw...swan).

|                 | raw      | betaqn   | naten    | nanet    | nanes    | danes    | danet    | danen    | daten1   | daten2   | nasen    | dasen    | fuks     | tost     | swan     |
|-----------------|----------|----------|----------|----------|----------|----------|----------|----------|----------|----------|----------|----------|----------|----------|----------|
| <b>DMRSE</b>    | 2.22E-03 | 2.69E-03 | 1.98E-03 | 1.94E-03 | 1.45E-03 | 1.41E-03 | 1.87E-03 | 2.19E-03 | 1.91E-03 | 1.92E-03 | 1.45E-03 | 1.41E-03 | 2.22E-03 | 1.75E-03 | 2.15E-03 |
| <b>GCOSE_AA</b> | 6.10E-05 | 8.98E-05 | 1.37E-04 | 1.28E-04 | 1.34E-04 | 1.63E-04 | 1.37E-04 | 1.17E-04 | 1.64E-04 | 1.63E-04 | 1.34E-04 | 1.63E-04 | 6.10E-05 | 1.83E-04 | 1.32E-04 |
| <b>GCOSE_AB</b> | 1.71E-04 | 2.32E-04 | 1.68E-04 | 1.60E-04 | 1.57E-04 | 1.33E-04 | 1.45E-04 | 1.59E-04 | 1.50E-04 | 1.50E-04 | 1.57E-04 | 1.33E-04 | 1.71E-04 | 1.86E-04 | 1.54E-04 |
| <b>GCOSE_BB</b> | 9.51E-05 | 8.50E-05 | 6.35E-05 | 6.91E-05 | 6.56E-05 | 5.07E-05 | 6.22E-05 | 5.05E-05 | 3.39E-05 | 3.74E-05 | 6.56E-05 | 5.07E-05 | 9.51E-05 | 1.03E-04 | 2.51E-04 |
| <b>Seabird</b>  | 4.68E-02 | 3.96E-02 | 3.82E-02 | 3.71E-02 | 4.72E-02 | 4.67E-02 | 3.75E-02 | 4.28E-02 | 3.80E-02 | 3.91E-02 | 4.72E-02 | 4.67E-02 | 4.68E-02 | 5.23E-02 | 5.00E-02 |

B. For each preprocessing method take mean of 3 SNP scores [A] to generate just 1 SNP score

|                | raw      | betaqn   | naten    | nanet    | nanes    | danes    | danet    | danen    | daten1   | daten2   | nasen    | dasen    | fuks     | tost     | swan     |
|----------------|----------|----------|----------|----------|----------|----------|----------|----------|----------|----------|----------|----------|----------|----------|----------|
| <b>DMRSE</b>   | 2.22E-03 | 2.69E-03 | 1.98E-03 | 1.94E-03 | 1.45E-03 | 1.41E-03 | 1.87E-03 | 2.19E-03 | 1.91E-03 | 1.92E-03 | 1.45E-03 | 1.41E-03 | 2.22E-03 | 1.75E-03 | 2.15E-03 |
| <b>GCOSE</b>   | 1.09E-04 | 1.36E-04 | 1.23E-04 | 1.19E-04 | 1.19E-04 | 1.15E-04 | 1.15E-04 | 1.09E-04 | 1.16E-04 | 1.17E-04 | 1.19E-04 | 1.15E-04 | 1.09E-04 | 1.57E-04 | 1.79E-04 |
| <b>Seabird</b> | 4.68E-02 | 3.96E-02 | 3.82E-02 | 3.71E-02 | 4.72E-02 | 4.67E-02 | 3.75E-02 | 4.28E-02 | 3.80E-02 | 3.91E-02 | 4.72E-02 | 4.67E-02 | 4.68E-02 | 5.23E-02 | 5.00E-02 |

C. For each of the three metrics [B] rank the preprocessing methods

|                | raw  | betaqn | naten | nanet | nanes | danes | danet | danen | daten1 | daten2 | nasen | dasen | fuks | tost | swan |
|----------------|------|--------|-------|-------|-------|-------|-------|-------|--------|--------|-------|-------|------|------|------|
| <b>DMRSE</b>   | 13.5 | 15     | 10    | 9     | 3.5   | 1     | 6     | 12    | 7      | 8      | 3.5   | 2     | 13.5 | 5    | 11   |
| <b>GCOSE</b>   | 2.5  | 13     | 12    | 11    | 9.5   | 5.5   | 4     | 1     | 7      | 8      | 9.5   | 5.5   | 2.5  | 14   | 15   |
| <b>Seabird</b> | 10.5 | 6      | 4     | 1     | 12.5  | 8.5   | 2     | 7     | 3      | 5      | 12.5  | 8.5   | 10.5 | 15   | 14   |

D. For each of the preprocessing methods calculate the mean of the 3 ranked metrics [C]

|                  | raw | betaqn | naten | nanet | nanes | danes | danet | danen | daten1 | daten2 | nasen | dasen | fuks | tost | swan |
|------------------|-----|--------|-------|-------|-------|-------|-------|-------|--------|--------|-------|-------|------|------|------|
| <b>Mean rank</b> | 8.8 | 11.3   | 8.7   | 7.0   | 8.5   | 5.0   | 4.0   | 6.7   | 5.7    | 7.0    | 8.5   | 5.3   | 8.8  | 11.3 | 13.3 |

E. For each preprocessing method calculate the mean of mean ranks [D] across the datasets, for Type I and Type II probes separately.

### Type I

| MEAN RANK             | raw   | betaqn | naten | nanet | nanes | danes | danet | danen | daten1 | daten2 | nasen | dasen | fuks  | tost  | swan  |
|-----------------------|-------|--------|-------|-------|-------|-------|-------|-------|--------|--------|-------|-------|-------|-------|-------|
| Cohort_1C [D]         | 5.17  | 11.67  | 9.00  | 8.67  | 7.50  | 4.83  | 8.67  | 5.33  | 7.00   | 10.67  | 7.50  | 4.83  | 5.17  | 11.00 | 13.00 |
| Cohort_1B [D]         | 6.50  | 10.33  | 7.67  | 6.33  | 7.83  | 9.17  | 5.33  | 10.00 | 6.33   | 7.00   | 7.83  | 9.17  | 6.50  | 9.00  | 11.00 |
| Cohort_1D [D]         | 4.17  | 11.33  | 9.33  | 7.67  | 6.50  | 6.00  | 8.67  | 7.00  | 7.67   | 10.00  | 6.50  | 5.67  | 4.17  | 10.67 | 14.67 |
| Cohort_1Ai [D]        | 7.83  | 10.67  | 8.33  | 7.67  | 8.50  | 5.83  | 4.67  | 8.33  | 4.33   | 7.33   | 8.50  | 5.83  | 7.83  | 10.67 | 13.67 |
| Cohort_1BC [D]        | 8.83  | 11.33  | 8.67  | 7.00  | 8.50  | 5.00  | 4.00  | 6.67  | 5.67   | 7.00   | 8.50  | 5.33  | 8.83  | 11.33 | 13.33 |
| Cohort_1AD [D]        | 7.17  | 11.67  | 7.00  | 5.33  | 9.50  | 7.50  | 5.00  | 8.00  | 5.33   | 6.33   | 9.50  | 7.50  | 7.17  | 11.67 | 11.33 |
| Cohort_1Aii [D]       | 5.83  | 14.33  | 9.67  | 9.00  | 9.50  | 4.50  | 8.33  | 5.33  | 6.33   | 6.00   | 9.50  | 4.50  | 5.83  | 11.33 | 10.00 |
| Cohort_1E [D]         | 7.17  | 11.67  | 7.67  | 5.33  | 9.83  | 7.83  | 3.67  | 7.00  | 5.00   | 5.67   | 9.83  | 7.83  | 7.17  | 11.33 | 13.00 |
| Cohort_2A [D]         | 7.50  | 14.33  | 11.00 | 10.67 | 4.17  | 5.83  | 4.33  | 7.00  | 6.00   | 6.33   | 4.17  | 5.83  | 7.50  | 14.00 | 11.33 |
| Cohort_2B [D]         | 7.17  | 12.00  | 7.33  | 7.67  | 6.17  | 5.50  | 5.33  | 6.00  | 9.33   | 8.67   | 6.17  | 5.50  | 7.17  | 13.00 | 13.00 |
| Cohort_3A [D]         | 11.50 | 12.00  | 9.00  | 11.00 | 5.50  | 3.00  | 4.00  | 8.00  | 3.00   | 5.00   | 5.50  | 3.00  | 11.50 | 13.00 | NA    |
| MEAN RANK OF RANK [E] | 7.17  | 11.94  | 8.61  | 7.85  | 7.59  | 5.91  | 5.64  | 7.15  | 6.00   | 7.27   | 7.59  | 5.91  | 7.17  | 11.55 | 12.43 |

### Type II

| MEAN RANK             | raw   | betaqn | naten | nanet | nanes | danes | danet | danen | daten1 | daten2 | nasen | dasen | fuks  | tost  | swan  |
|-----------------------|-------|--------|-------|-------|-------|-------|-------|-------|--------|--------|-------|-------|-------|-------|-------|
| Cohort_1C [D]         | 9.67  | 11.67  | 9.67  | 7.67  | 7.50  | 7.50  | 6.00  | 10.00 | 5.00   | 5.67   | 1.50  | 1.50  | 11.33 | 13.33 | 12.00 |
| Cohort_1B [D]         | 12.33 | 10.00  | 6.00  | 4.33  | 6.50  | 6.50  | 4.33  | 12.67 | 6.67   | 5.67   | 5.17  | 5.17  | 12.67 | 13.00 | 9.00  |
| Cohort_1D [D]         | 12.33 | 11.00  | 7.67  | 5.67  | 7.83  | 7.83  | 7.00  | 12.67 | 6.00   | 5.67   | 3.50  | 3.50  | 10.33 | 11.00 | 8.00  |
| Cohort_1Ai [D]        | 12.67 | 11.00  | 8.00  | 5.00  | 5.83  | 5.83  | 3.67  | 13.00 | 3.67   | 4.00   | 4.50  | 4.50  | 13.00 | 11.67 | 13.67 |
| Cohort_1BC [D]        | 7.00  | 11.00  | 6.67  | 8.33  | 5.50  | 5.50  | 9.00  | 6.67  | 5.00   | 5.67   | 6.50  | 6.50  | 12.33 | 13.33 | 11.00 |
| Cohort_1AD [D]        | 5.67  | 12.67  | 8.67  | 7.33  | 5.83  | 5.83  | 8.33  | 6.00  | 8.67   | 9.00   | 6.50  | 6.50  | 12.00 | 11.67 | 5.33  |
| Cohort_1Aii [D]       | 10.00 | 12.33  | 7.00  | 4.67  | 9.83  | 9.83  | 8.00  | 9.67  | 5.00   | 4.67   | 5.17  | 5.17  | 10.00 | 9.33  | 9.33  |
| Cohort_1E [D]         | 8.67  | 10.67  | 6.67  | 7.33  | 6.17  | 6.17  | 7.33  | 9.00  | 8.00   | 8.00   | 3.50  | 3.50  | 14.33 | 10.67 | 10.00 |
| Cohort_2A [D]         | 13.67 | 11.00  | 4.67  | 3.67  | 8.50  | 8.50  | 3.67  | 12.67 | 3.67   | 4.00   | 4.50  | 4.50  | 14.00 | 12.00 | 11.00 |
| Cohort_2B [D]         | 9.00  | 11.33  | 6.00  | 4.67  | 10.50 | 10.50 | 7.33  | 9.33  | 6.00   | 6.33   | 3.17  | 3.17  | 9.67  | 10.67 | 12.33 |
| Cohort_3A [D]         | 12.00 | 7.00   | 9.50  | 4.00  | 4.00  | 4.00  | 3.00  | 12.00 | 6.50   | 8.50   | 4.50  | 4.50  | 13.50 | 12.00 | NA    |
| MEAN RANK OF RANK [E] | 10.27 | 10.88  | 7.32  | 5.70  | 7.09  | 7.09  | 6.15  | 10.33 | 5.83   | 6.11   | 4.41  | 4.41  | 12.11 | 11.70 | 10.17 |

F. Rank the mean of metric values across all datasets [E] to generate a final score representing the performance of each of the 15 preprocessing methods (see Table 2).

| <b>[E]</b> | Type I | Type II |
|------------|--------|---------|
| raw        | 7.17   | 10.27   |
| betaqn     | 11.94  | 10.88   |
| naten      | 8.61   | 7.32    |
| nanet      | 7.85   | 5.70    |
| nanes      | 7.59   | 7.09    |
| danes      | 5.91   | 7.09    |
| danet      | 5.64   | 6.15    |
| danen      | 7.15   | 10.33   |
| daten1     | 6.00   | 5.83    |
| daten2     | 7.27   | 6.11    |
| nasen      | 7.59   | 4.41    |
| dasen      | 5.91   | 4.41    |
| fuks       | 7.17   | 12.11   |
| tost       | 11.55  | 11.70   |
| swan       | 12.43  | 10.17   |

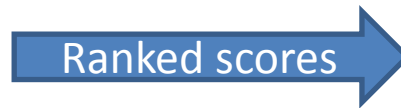

| <b>[F]</b>   | Type I     | Type II    | Average    |
|--------------|------------|------------|------------|
| raw          | 6.5        | 11.0       | 8.8        |
| betaqn       | 14.0       | 13.0       | 13.5       |
| naten        | 12.0       | 9.0        | 10.5       |
| nanet        | 11.0       | 3.0        | 7.0        |
| nanes        | 9.5        | 7.5        | 8.5        |
| danes        | 2.5        | 7.5        | 5.0        |
| danet        | 1.0        | 6.0        | 3.5        |
| danen        | 5.0        | 12.0       | 8.5        |
| daten1       | 4.0        | 4.0        | 4.0        |
| daten2       | 8.0        | 5.0        | 6.5        |
| nasen        | 9.5        | 1.5        | 5.5        |
| <b>dasen</b> | <b>2.5</b> | <b>1.5</b> | <b>2.0</b> |
| fuks         | 6.5        | 15.0       | 10.8       |
| tost         | 13.0       | 14.0       | 13.5       |
| swan         | 15.0       | 10.0       | 12.5       |
